# Supplementary material
Source: publisher figshare collection journal article supplement (https://tandf.figshare.com/articles/dataset/_/21963280)
Supplement: Supplementary file 1 [file 1]

**Table S2.** 4-OH-MPT putative metabolites predicted with GLORYx freeware and their prediction score (adjusted score for second-generation metabolites)

| ID    | Transformation                       | Elemental composition                                           | Score | SMILES                                                       | Comment  |
|-------|--------------------------------------|-----------------------------------------------------------------|-------|--------------------------------------------------------------|----------|
| P1    | O-Sulfation                          | C <sub>14</sub> H <sub>20</sub> N <sub>2</sub> O <sub>4</sub> S | 93.0% | O=S(=O)(O)Oc1cccc2[NH]cc(CCN(C)CCC)c21                       |          |
| P1-1  | + Hydroxylation (propyl chain)       | C <sub>14</sub> H <sub>20</sub> N <sub>2</sub> O <sub>5</sub> S | 44.6% | CCC(O)N(C)CCc1c[NH]c2cccc(OS(=O)(=O)O)c21                    | = P4-2   |
| P1-2  | + Hydroxylation (propyl chain)       | C <sub>14</sub> H <sub>20</sub> N <sub>2</sub> O <sub>5</sub> S | 44.6% | CC(O)CN(C)CCc1c[NH]c2cccc(OS(=O)(=O)O)c21                    | = P5-3   |
| P1-3  | + Hydroxylation (propyl chain)       | C <sub>14</sub> H <sub>20</sub> N <sub>2</sub> O <sub>5</sub> S | 44.6% | O=S(=O)(O)Oc1cccc2[NH]cc(CCN(C)CCCO)c21                      | = P6-2   |
| P1-4  | + N-Oxidation (alkyl chain)          | C <sub>14</sub> H <sub>20</sub> N <sub>2</sub> O <sub>5</sub> S | 44.6% | O=S(=O)(O)Oc1cccc2[NH]cc(CCN([N+])([O-])(C)CCC)c21           | = P7-1   |
| P1-5  | + Carboxylation (propyl chain)       | C <sub>14</sub> H <sub>18</sub> N <sub>2</sub> O <sub>6</sub> S | 44.6% | O=C(O)CCN(C)CCc1c[NH]c2cccc(OS(=O)(=O)O)c21                  |          |
| P1-6  | + N-Demethylation                    | C <sub>13</sub> H <sub>18</sub> N <sub>2</sub> O <sub>4</sub> S | 44.6% | O=S(=O)(O)Oc1cccc2[NH]cc(CCNCCC)c21                          | = P9-1   |
| P1-7  | + N-Depropylation                    | C <sub>11</sub> H <sub>14</sub> N <sub>2</sub> O <sub>4</sub> S | 44.6% | O=S(=O)(O)Oc1cccc2[NH]cc(CCN(C)C)c21                         | = P10-1  |
| P1-8  | + Desulfation                        | C <sub>14</sub> H <sub>20</sub> N <sub>2</sub> O                | 39.1% | CCCN(C)CCc1c[NH]c2cccc(O)c21                                 | = parent |
| P2    | O-Glucuronidation                    | C <sub>20</sub> H <sub>28</sub> N <sub>2</sub> O <sub>7</sub>   | 84.0% | CCCN(C)CCc1c[NH]c2cccc(OC3OC(C(O)C(O)C3O)C(=O)O)c21          |          |
| P2-1  | + Glucuronide opening                | C <sub>20</sub> H <sub>28</sub> N <sub>2</sub> O <sub>8</sub>   | 41.2% | O=C(O)C(O)C(O)C(O)C(O)C(=O)Oc1cccc2[NH]cc(CCN(C)CCC)c21      |          |
| P2-2  | + Glucuronide opening                | C <sub>20</sub> H <sub>28</sub> N <sub>2</sub> O <sub>8</sub>   | 41.2% | O=C(O)C(=O)C(O)C(O)C(O)C(O)Oc1cccc2[NH]cc(CCN(C)CCC)c21      |          |
| P2-3  | + Deglucuronidation                  | C <sub>14</sub> H <sub>20</sub> N <sub>2</sub> O                | 41.2% | CCCN(C)CCc1c[NH]c2cccc(O)c21                                 | = parent |
| P2-4  | + Hydroxylation (glucuronide)        | C <sub>20</sub> H <sub>28</sub> N <sub>2</sub> O <sub>8</sub>   | 41.2% | CCCN(C)CCc1c[NH]c2cccc(OC3(O)OC(C(O)C(O)C3O)C(=O)O)c21       |          |
| P2-5  | + Hydroxylation (propyl chain)       | C <sub>20</sub> H <sub>28</sub> N <sub>2</sub> O <sub>8</sub>   | 40.3% | CCC(O)N(C)CCc1c[NH]c2cccc(OC3OC(C(O)C(O)C3O)C(=O)O)c21       | = P4-3   |
| P2-6  | + Hydroxylation (propyl chain)       | C <sub>20</sub> H <sub>28</sub> N <sub>2</sub> O <sub>8</sub>   | 40.3% | CC(O)CN(C)CCc1c[NH]c2cccc(OC3OC(C(O)C(O)C3O)C(=O)O)c21       | = P5-4   |
| P2-7  | + Hydroxylation (propyl chain)       | C <sub>20</sub> H <sub>28</sub> N <sub>2</sub> O <sub>8</sub>   | 40.3% | OCCCN(C)CCc1c[NH]c2cccc(OC3OC(C(O)C(O)C3O)C(=O)O)c21         | = P6-4   |
| P2-8  | + N-Oxidation (alkyl chain)          | C <sub>20</sub> H <sub>28</sub> N <sub>2</sub> O <sub>8</sub>   | 40.3% | [O-][N+](C)(CCC)CCc1c[NH]c2cccc(OC3OC(C(O)C(O)C3O)C(=O)O)c21 | = P7-2   |
| P2-9  | + Carboxylation (propyl chain)       | C <sub>20</sub> H <sub>26</sub> N <sub>2</sub> O <sub>9</sub>   | 40.3% | O=C(O)CCN(C)CCc1c[NH]c2cccc(OC3OC(C(O)C(O)C3O)C(=O)O)c21     |          |
| P2-10 | + N-Demethylation                    | C <sub>19</sub> H <sub>26</sub> N <sub>2</sub> O <sub>7</sub>   | 40.3% | O=C(O)C1OC(Oc2cccc3[NH]cc(CCNCCC)c23)C(O)C(O)C1O             | = P9-2   |
| P2-11 | + N-Depropylation                    | C <sub>17</sub> H <sub>22</sub> N <sub>2</sub> O <sub>7</sub>   | 40.3% | O=C(O)C1OC(Oc2cccc3[NH]cc(CCN(C)C)c23)C(O)C(O)C1O            | = P10-2  |
| P3    | O-Methylation                        | C <sub>15</sub> H <sub>22</sub> N <sub>2</sub> O                | 47.0% | CCCN(C)CCc1c[NH]c2cccc(OC)c21                                |          |
| P4    | Hydroxylation (propyl chain)         | C <sub>14</sub> H <sub>20</sub> N <sub>2</sub> O <sub>2</sub>   | 43.0% | CCC(O)N(C)CCc1c[NH]c2cccc(O)c21                              |          |
| P4-1  | + O-Sulfation (propyl chain)         | C <sub>14</sub> H <sub>20</sub> N <sub>2</sub> O <sub>5</sub> S | 40.4% | O=S(=O)(O)OC(CCN(C)CCc1c[NH]c2cccc(O)c21                     |          |
| P4-2  | + O-Sulfation (indole)               | C <sub>14</sub> H <sub>20</sub> N <sub>2</sub> O <sub>5</sub> S | 40.0% | CCC(O)N(C)CCc1c[NH]c2cccc(OS(=O)(=O)O)c21                    | = P1-1   |
| P4-3  | + O-Glucuronidation (indole)         | C <sub>20</sub> H <sub>28</sub> N <sub>2</sub> O <sub>8</sub>   | 36.1% | CCC(O)N(C)CCc1c[NH]c2cccc(OC3OC(C(O)C(O)C3O)C(=O)O)c21       | = P2-5   |
| P4-4  | + O-Glucuronidation (propyl chain)   | C <sub>20</sub> H <sub>28</sub> N <sub>2</sub> O <sub>8</sub>   | 28.0% | OC1cccc2[NH]cc(CCN(C)C)OC3OC(C(O)C(O)C3O)C(=O)O)CCc12        |          |
| P5    | Hydroxylation (propyl chain)         | C <sub>14</sub> H <sub>20</sub> N <sub>2</sub> O <sub>2</sub>   | 43.0% | CC(O)CN(C)CCc1c[NH]c2cccc(O)c21                              |          |
| P5-1  | + O-Sulfation (propyl chain)         | C <sub>14</sub> H <sub>20</sub> N <sub>2</sub> O <sub>5</sub> S | 42.6% | O=S(=O)(O)OC(CCN(C)CCc1c[NH]c2cccc(O)c21                     |          |
| P5-2  | + O-Glucuronidation (propyl chain)   | C <sub>20</sub> H <sub>28</sub> N <sub>2</sub> O <sub>8</sub>   | 41.3% | OC1cccc2[NH]cc(CCN(C)CC(C)OC3OC(C(O)C(O)C3O)C(=O)O)c12       |          |
| P5-3  | + O-Sulfation (indole)               | C <sub>14</sub> H <sub>20</sub> N <sub>2</sub> O <sub>5</sub> S | 40.0% | CC(O)CN(C)CCc1c[NH]c2cccc(OS(=O)(=O)O)c21                    | = P1-2   |
| P5-4  | + O-Glucuronidation (indole)         | C <sub>20</sub> H <sub>28</sub> N <sub>2</sub> O <sub>8</sub>   | 36.1% | CC(O)CN(C)CCc1c[NH]c2cccc(OC3OC(C(O)C(O)C3O)C(=O)O)c21       | = P2-6   |
| P6    | Hydroxylation (propyl chain)         | C <sub>14</sub> H <sub>20</sub> N <sub>2</sub> O <sub>2</sub>   | 43.0% | OCCCN(C)CCc1c[NH]c2cccc(O)c21                                |          |
| P6-1  | + O-Sulfation (propyl chain)         | C <sub>14</sub> H <sub>20</sub> N <sub>2</sub> O <sub>5</sub> S | 40.9% | O=S(=O)(O)OCCCN(C)CCc1c[NH]c2cccc(O)c21                      |          |
| P6-2  | + O-Sulfation (indole)               | C <sub>14</sub> H <sub>20</sub> N <sub>2</sub> O <sub>5</sub> S | 40.0% | O=S(=O)(O)Oc1cccc2[NH]cc(CCN(C)CCCO)c21                      | = P1-3   |
| P6-3  | + O-Glucuronidation (propyl chain)   | C <sub>20</sub> H <sub>28</sub> N <sub>2</sub> O <sub>8</sub>   | 40.0% | OC1cccc2[NH]cc(CCN(C)CCCO)C3OC(C(O)C(O)C3O)C(=O)O)c12        |          |
| P6-4  | + O-Glucuronidation (indole)         | C <sub>20</sub> H <sub>28</sub> N <sub>2</sub> O <sub>8</sub>   | 35.3% | OCCCN(C)CCc1c[NH]c2cccc(OC3OC(C(O)C(O)C3O)C(=O)O)c21         | = P2-7   |
| P7    | N-Oxidation (alkyl chain)            | C <sub>14</sub> H <sub>20</sub> N <sub>2</sub> O <sub>2</sub>   | 43.0% | [O-][N+](C)(CCC)CCc1c[NH]c2cccc(O)c21                        |          |
| P7-1  | + O-Sulfation (indole)               | C <sub>14</sub> H <sub>20</sub> N <sub>2</sub> O <sub>5</sub> S | 40.0% | O=S(=O)(O)Oc1cccc2[NH]cc(CCN([N+])([O-])(C)CCC)c21           | = P1-4   |
| P7-2  | + O-Glucuronidation (indole)         | C <sub>20</sub> H <sub>28</sub> N <sub>2</sub> O <sub>8</sub>   | 36.1% | [O-][N+](C)(CCC)CCc1c[NH]c2cccc(OC3OC(C(O)C(O)C3O)C(=O)O)c21 | = P2-8   |
| P7-3  | + O-Methylation (indole)             | C <sub>15</sub> H <sub>22</sub> N <sub>2</sub> O <sub>2</sub>   | 33.5% | [O-][N+](C)(CCC)CCc1c[NH]c2cccc(OC)c21                       |          |
| P8    | Carboxylation (propyl chain)         | C <sub>14</sub> H <sub>18</sub> N <sub>2</sub> O <sub>3</sub>   | 43.0% | O=C(O)CCN(C)CCc1c[NH]c2cccc(O)c21                            |          |
| P8-1  | + O-Glucuronidation (carboxyl group) | C <sub>20</sub> H <sub>28</sub> N <sub>2</sub> O <sub>9</sub>   | 40.9% | O=C(OC1OC(C(O)C(O)C1O)C(=O)O)CCN(C)CCc1c[NH]c2cccc(O)c21     |          |
| P8-2  | + O-Sulfation (indole)               | C <sub>14</sub> H <sub>18</sub> N <sub>2</sub> O <sub>6</sub> S | 40.0% | O=C(O)CCN(C)CCc1c[NH]c2cccc(OS(=O)(=O)O)c21                  |          |
| P8-3  | + O-Glucuronidation (indole)         | C <sub>20</sub> H <sub>26</sub> N <sub>2</sub> O <sub>9</sub>   | 35.3% | O=C(O)CCN(C)CCc1c[NH]c2cccc(OC3OC(C(O)C(O)C3O)C(=O)O)c21     |          |
| P9    | N-Demethylation                      | C <sub>13</sub> H <sub>18</sub> N <sub>2</sub> O                | 43.0% | OC1cccc2[NH]cc(CCNCCC)c21                                    |          |
| P9-1  | + O-Sulfation                        | C <sub>13</sub> H <sub>18</sub> N <sub>2</sub> O <sub>4</sub> S | 40.0% | O=S(=O)(O)Oc1cccc2[NH]cc(CCNCCC)c21                          | = P1-6   |
| P9-2  | + O-Glucuronidation                  | C <sub>19</sub> H <sub>26</sub> N <sub>2</sub> O <sub>7</sub>   | 36.1% | O=C(O)C1OC(Oc2cccc3[NH]cc(CCNCCC)c23)C(O)C(O)C1O             | = P2-10  |
| P10   | N-Depropylation                      | C <sub>11</sub> H <sub>14</sub> N <sub>2</sub> O                | 43.0% | OC1cccc2[NH]cc(CCN(C)C)c21                                   |          |
| P10-1 | + O-Sulfation                        | C <sub>11</sub> H <sub>14</sub> N <sub>2</sub> O <sub>4</sub> S | 40.4% | O=S(=O)(O)Oc1cccc2[NH]cc(CCN(C)C)c21                         | = P1-7   |
| P10-2 | + O-Glucuronidation                  | C <sub>17</sub> H <sub>22</sub> N <sub>2</sub> O <sub>7</sub>   | 36.6% | O=C(O)C1OC(Oc2cccc3[NH]cc(CCN(C)C)c23)C(O)C(O)C1O            | = P2-11  |
| P10-3 | + N-Acetylation (alkyl chain)        | C <sub>13</sub> H <sub>16</sub> N <sub>2</sub> O <sub>2</sub>   | 34.8% | CC(=O)N(C)CCc1c[NH]c2cccc(O)c21                              |          |
| P11   | Hydroxylation (indole)               | C <sub>14</sub> H <sub>20</sub> N <sub>2</sub> O <sub>2</sub>   | 31.0% | CCCN(C)CCc1c2c(cccc2O)[NH]c1O                                |          |
| P12   | Hydroxylation (methyl chain)         | C <sub>14</sub> H <sub>20</sub> N <sub>2</sub> O <sub>2</sub>   | 25.0% | CCCN(CO)CCc1c[NH]c2cccc(O)c21                                |          |
