# Supplementary material
Source: publisher figshare collection journal article supplement (https://tandf.figshare.com/articles/dataset/_/21963280)
Supplement: Supplementary file 2 [file 1]

**Table S1.** Inclusion lists for liquid chromatography-high-resolution tandem mass spectrometry analysis of human hepatocyte incubates

| Composition change | Elemental composition                                           | [M+H] <sup>+</sup> ,<br><i>m/z</i> | [M-H] <sup>-</sup> ,<br><i>m/z</i> | Reference transformation                                       |
|--------------------|-----------------------------------------------------------------|------------------------------------|------------------------------------|----------------------------------------------------------------|
| -                  | C <sub>14</sub> H <sub>20</sub> N <sub>2</sub> O                | 233.1648                           | 231.1503                           | None (parent)                                                  |
| +3O +S             | C <sub>14</sub> H <sub>20</sub> N <sub>2</sub> O <sub>4</sub> S | 313.1216                           | 311.1071                           | Sulfation                                                      |
| +6C +8H +6O        | C <sub>20</sub> H <sub>28</sub> N <sub>2</sub> O <sub>7</sub>   | 409.1969                           | 407.1824                           | Glucuronidation                                                |
| +C +2H             | C <sub>15</sub> H <sub>22</sub> N <sub>2</sub> O                | 247.1805                           | 245.1659                           | Methylation                                                    |
| +O                 | C <sub>14</sub> H <sub>20</sub> N <sub>2</sub> O <sub>2</sub>   | 249.1598                           | 247.1452                           | Hydroxylation                                                  |
| -3C -6H            | C <sub>11</sub> H <sub>14</sub> N <sub>2</sub> O                | 191.1179                           | 189.1033                           | <i>N</i> -Depropylation                                        |
| -C -2H             | C <sub>13</sub> H <sub>18</sub> N <sub>2</sub> O                | 219.1492                           | 217.1346                           | <i>N</i> -Demethylation                                        |
| -2H +2O            | C <sub>14</sub> H <sub>18</sub> N <sub>2</sub> O <sub>3</sub>   | 263.1390                           | 261.1245                           | Carboxylic acid formation ( $\omega$ -alkyl)                   |
| -4C -9H -N +O      | C <sub>10</sub> H <sub>11</sub> NO <sub>2</sub>                 | 178.0863                           | 176.0717                           | <i>N</i> -Dealkylation to alcohol                              |
| -4C -11H -N +O     | C <sub>10</sub> H <sub>9</sub> NO <sub>2</sub>                  | 176.0706                           | 174.0561                           | <i>N</i> -Dealkylation to aldehyde                             |
| -2H                | C <sub>14</sub> H <sub>18</sub> N <sub>2</sub> O                | 231.1492                           | 229.1346                           | Dehydrogenation                                                |
| -2H +O             | C <sub>14</sub> H <sub>18</sub> N <sub>2</sub> O <sub>2</sub>   | 247.1441                           | 245.1296                           | Oxidation                                                      |
| +4O +S             | C <sub>14</sub> H <sub>20</sub> N <sub>2</sub> O <sub>5</sub> S | 329.1166                           | 327.1021                           | Sulfation + Hydroxylation                                      |
| -3C -6H +3O +S     | C <sub>11</sub> H <sub>14</sub> N <sub>2</sub> O <sub>4</sub> S | 271.0747                           | 269.0602                           | Sulfation + <i>N</i> -Depropylation                            |
| -C -2H +3O +S      | C <sub>13</sub> H <sub>18</sub> N <sub>2</sub> O <sub>4</sub> S | 299.1060                           | 297.0914                           | Sulfation + <i>N</i> -Demethylation                            |
| -2H +5O +S         | C <sub>14</sub> H <sub>18</sub> N <sub>2</sub> O <sub>6</sub> S | 343.0958                           | 341.0813                           | Sulfation + Carboxylic acid formation ( $\omega$ -alkyl)       |
| +6C +8H +7O        | C <sub>20</sub> H <sub>28</sub> N <sub>2</sub> O <sub>8</sub>   | 425.1918                           | 423.1773                           | Glucuronidation + Hydroxylation                                |
| +3C +2H +6O        | C <sub>17</sub> H <sub>22</sub> N <sub>2</sub> O <sub>7</sub>   | 367.1500                           | 365.1354                           | Glucuronidation + <i>N</i> -Depropylation                      |
| +5C +6H +6O        | C <sub>19</sub> H <sub>26</sub> N <sub>2</sub> O <sub>7</sub>   | 395.1813                           | 393.1667                           | Glucuronidation + <i>N</i> -Demethylation                      |
| +6C +6H +8O        | C <sub>20</sub> H <sub>26</sub> N <sub>2</sub> O <sub>9</sub>   | 439.1711                           | 437.1566                           | Glucuronidation + Carboxylic acid formation ( $\omega$ -alkyl) |
| +C +2H +O          | C <sub>15</sub> H <sub>22</sub> N <sub>2</sub> O <sub>2</sub>   | 263.1754                           | 261.1609                           | Methylation + Hydroxylation                                    |
| -2C +4H            | C <sub>12</sub> H <sub>16</sub> N <sub>2</sub> O                | 205.1336                           | 203.1190                           | Methylation + <i>N</i> -Depropylation                          |
| +C +2O             | C <sub>15</sub> H <sub>20</sub> N <sub>2</sub> O <sub>3</sub>   | 277.1547                           | 275.1401                           | Methylation + Carboxylic acid formation ( $\omega$ -alkyl)     |
| +2O                | C <sub>14</sub> H <sub>20</sub> N <sub>2</sub> O <sub>3</sub>   | 265.1547                           | 263.1401                           | Dihydroxylation                                                |
| -2C -6H +2O        | C <sub>12</sub> H <sub>14</sub> N <sub>2</sub> O <sub>3</sub>   | 235.1077                           | 233.0932                           | <i>N</i> -Depropylation + <i>N</i> -Carboxylation              |
| -C -2H +O          | C <sub>13</sub> H <sub>18</sub> N <sub>2</sub> O <sub>2</sub>   | 235.1441                           | 233.1296                           | <i>N</i> -Demethylation+ Hydroxylation                         |
| +C +2H +4O +S      | C <sub>15</sub> H <sub>22</sub> N <sub>2</sub> O <sub>5</sub> S | 343.1322                           | 341.1177                           | Sulfation + Methylation + Hydroxylation                        |
| +7C +10H +7O       | C <sub>21</sub> H <sub>30</sub> N <sub>2</sub> O <sub>8</sub>   | 439.2075                           | 437.1929                           | Glucuronidation + Methylation + Hydroxylation                  |
